# Supplementary material for: miRNA Expression May Have Implications for Immunotherapy in PDGFRA Mutant GISTs
Source: MDPI journal article supplement (doi:10.3390/ijms232012248), 2022-10-14
Supplement: s1 [file s1]

## Supplementary Material

### 1 Supplementary Figures and Tables

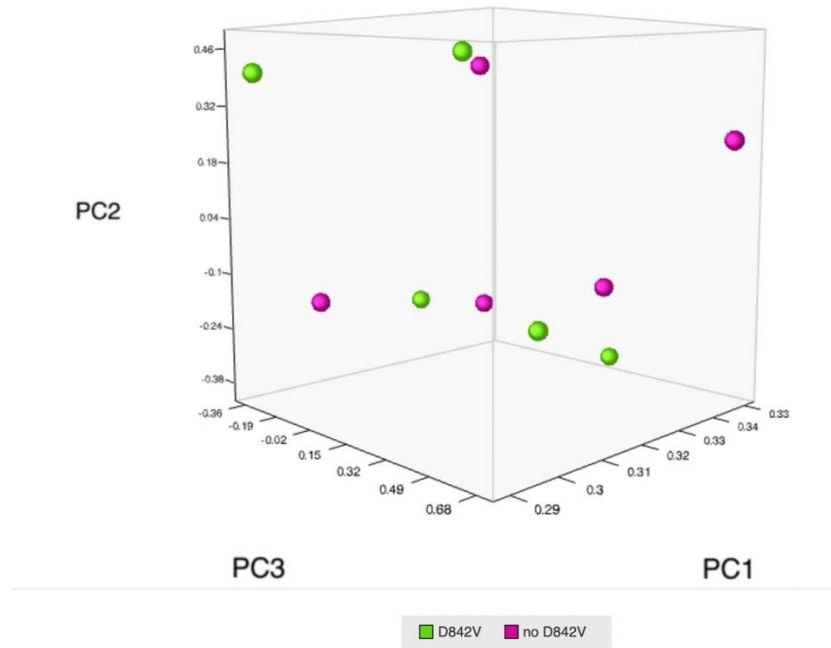

Figure S1. Global miRNA expression analysis. Principal component analysis of 10 samples analyzed via TLDA array. Each dot represents the collective expression of all microRNAs in one sample. Each color is indicative of a different GIST group.

| <b>Supplemental Table S1: Reactome functional enrichment analysis</b>   |                       |
|-------------------------------------------------------------------------|-----------------------|
| <b>Pathway</b>                                                          | <b>Adjusted P val</b> |
| <b>Top 30 GO: Biological Processes</b>                                  |                       |
| Positive regulation of cellular metabolic process                       | 8.76E-19              |
| Positive regulation of metabolic process                                | 3.61E-18              |
| Regulation of cellular protein metabolic process                        | 9.83E-15              |
| Regulation of protein metabolic process                                 | 5.23E-14              |
| Positive regulation of nucleobase-containing compound metabolic process | 2.50E-12              |
| Positive regulation of protein metabolic process                        | 2.50E-12              |
| Positive regulation of cellular protein metabolic process               | 9.26E-12              |
| Regulation of apoptotic process                                         | 2.15E-11              |
| Regulation of programmed cell death                                     | 2.76E-11              |

|                                                                      |             |
|----------------------------------------------------------------------|-------------|
| Interphase of mitotic cell cycle                                     | 2.76E-11    |
| Cellular response to stress                                          | 2.76E-11    |
| Interphase                                                           | 3.39E-11    |
| Response to abiotic stimulus                                         | 4.07E-11    |
| Cellular protein metabolic process                                   | 4.21E-11    |
| Regulation of molecular function                                     | 7.87E-11    |
| Positive regulation of transcription from RNA polymerase II promoter | 8.19E-11    |
| Enzyme linked receptor protein signaling pathway                     | 2.36E-10    |
| Negative regulation of metabolic process                             | 2.42E-10    |
| Regulation of cellular metabolic process                             | 2.46E-10    |
| Epidermal growth factor receptor signaling pathway                   | 2.81E-10    |
| Positive regulation of transcription, DNA-dependent                  | 3.14E-10    |
| Interaction with host                                                | 3.14E-10    |
| Positive regulation of RNA metabolic process                         | 3.88E-10    |
| Negative regulation of cellular metabolic process                    | 3.88E-10    |
| Regulation of catalytic activity                                     | 4.12E-10    |
| Response to hypoxia                                                  | 4.12E-10    |
| Regulation of cell cycle                                             | 6.11E-10    |
| Protein modification process                                         | 6.14E-10    |
| Cell cycle                                                           | 6.45E-10    |
| Protein catabolic process                                            | 1.05E-09    |
| <b>Top 30 GO: Molecular function</b>                                 |             |
| Enzyme binding                                                       | 1.19E-16    |
| Positive regulation of transcription, DNA-dependent                  | 2.60E-09    |
| Transcription factor binding                                         | 2.60E-09    |
| Negative regulation of transcription, DNA-dependent                  | 2.60E-07    |
| Protein domain specific binding                                      | 3.04E-07    |
| Transcription from RNA polymerase II promoter                        | 6.57E-07    |
| Kinase binding                                                       | 6.77143E-06 |
| Protein kinase binding                                               | 7.07778E-06 |
| Protein binding, bridging                                            | 7.07778E-06 |
| Binding, bridging                                                    | 1.43636E-05 |
| Protein N-terminus binding                                           | 1.43636E-05 |
| Identical protein binding                                            | 4.01667E-05 |
| Nucleotide binding                                                   | 4.46923E-05 |
| Chromatin binding                                                    | 0.000139375 |
| Protein complex binding                                              | 0.000139375 |
| Protein C-terminus binding                                           | 0.000139375 |
| Histone deacetylase binding                                          | 0.000205882 |
| RNA binding                                                          | 0.000744444 |

|                                                    |             |
|----------------------------------------------------|-------------|
| ATP binding                                        | 0.00165     |
| Ubiquitin binding                                  | 0.00165     |
| Ligase activity, forming carbon-nitrogen bonds     | 0.001804762 |
| Adenyl ribonucleotide binding                      | 0.001992308 |
| Protein deacetylase activity                       | 0.001992308 |
| Adenyl nucleotide binding                          | 0.001992308 |
| Acid-amino acid ligase activity                    | 0.001992308 |
| Structure-specific DNA binding                     | 0.001992308 |
| Single-stranded RNA binding                        | 0.002463333 |
| Protein phosphatase binding                        | 0.002463333 |
| MAP kinase kinase kinase activity                  | 0.002463333 |
| Small conjugating protein binding                  | 0.002463333 |
| <b>Top 30 GO: Cellular component</b>               |             |
| Cytosol                                            | 1.73E-22    |
| Macromolecular complex                             | 6.87E-14    |
| Nucleoplasm                                        | 6.87E-14    |
| Nuclear part                                       | 3.93E-12    |
| Nuclear lumen                                      | 5.84E-12    |
| Protein complex                                    | 7.82E-12    |
| Membrane-enclosed lumen                            | 1.14E-11    |
| Organelle lumen                                    | 1.54E-11    |
| Nucleus                                            | 1.01E-10    |
| Nucleoplasm part                                   | 0.00000622  |
| Ubiquitin ligase complex                           | 0.000101818 |
| Spindle                                            | 0.000114167 |
| Nuclear body                                       | 0.000326154 |
| Histone deacetylase complex                        | 0.000596429 |
| Membrane-bounded vesicle                           | 0.00230625  |
| Eukaryotic translation initiation factor 3 complex | 0.00230625  |
| Ribonucleoprotein complex                          | 0.003852941 |
| Cytoplasm                                          | 0.003889474 |
| Intracellular organelle part                       | 0.003889474 |
| Organelle part                                     | 0.0048      |
| Transcription factor complex                       | 0.005285714 |
| Vesicle                                            | 0.005521739 |
| Nucleolus                                          | 0.005521739 |
| Spindle pole                                       | 0.006958333 |
| Nuclear chromatin                                  | 0.00932     |
| Spliceosomal complex                               | 0.009538462 |
| PML body                                           | 0.01525926  |
| Non-membrane-bounded organelle                     | 0.01874194  |

|                                              |            |
|----------------------------------------------|------------|
| Intracellular non-membrane-bounded organelle | 0.01874194 |
| Spindle microtubule                          | 0.01874194 |
